# Supplementary material for: Through Bonds or Contacts? Mapping Protein Vibrational Energy Transfer Using Non-canonical Amino Acids.
Source: Research Square preprint supplement (doi:10.21203/rs.3.rs-153063/v1), 2021-01-28
Supplement: Supplementary file 1 [file 3fec79772e1878f5f2ccb82f.pdf]

## Supplementary Information:

# Through Bonds or Contacts? Mapping Protein Vibrational Energy Transfer Using Non-Canonical Amino Acids.

Erhan Deniz<sup>1</sup>, Luis Valiño-Borau<sup>2</sup>, Jan G. Löffler<sup>1</sup>, Katharina B. Eberl<sup>1</sup>, Adnan Gulzar<sup>2</sup>, Steffen Wolf<sup>2</sup>, Patrick M. Durkin<sup>3</sup>, Robert Kaml<sup>3</sup>, Nediljko Budisa<sup>3,4</sup>, Gerhard Stock<sup>2,\*</sup> and Jens Bredenbeck<sup>1,\*</sup>

<sup>1</sup>Institute of Biophysics, Goethe University Frankfurt, 60438 Frankfurt/Main, Germany

<sup>2</sup>Biomolecular Dynamics, Institute of Physics, Albert Ludwigs University, 79104 Freiburg, Germany

<sup>3</sup>Institute of Chemistry, Technical University Berlin, Müller-Breslau-Straße 10, 10623 Berlin, Germany

<sup>4</sup>Department of Chemistry, University of Manitoba, 144 Dysart Rd., Winnipeg, R3T 2N2, Canada

## CONTENT

|                                     |   |
|-------------------------------------|---|
| 1. MATERIALS.....                   | 1 |
| 2. EXPERIMENTAL METHODS.....        | 2 |
| 3. COMPUTATIONAL METHODS.....       | 3 |
| 4. PARTIAL UNFOLDING of TRPZIP..... | 5 |
| 5. SOLVENT DYNAMICS.....            | 6 |
| 6. PATHWAYS.....                    | 7 |
| 7. REFERENCES.....                  | 8 |

## 1. MATERIALS

**Sample synthesis.** All peptides were synthesized on a Prelude Peptide Synthesizer by Gyros Protein Technologies (Upsala, Sweden) using rink amide resin via standard Fmoc solid-phase peptide synthesis employing TBTU and Hünig's base as coupling reagents and DMF as solvent.

Rink Amide resin was purchased from Iris Biotech (Marktredwitz, Germany) with a potential loading of 0.45-0.75 mmol/gram. The resin was pre-swollen in DMF, then a solution of Fmoc-protected amino acid purchased from Iris Biotech (Marktredwitz, Germany) was dissolved in DMF and Hünig's base (4 eq. of each) and mixed for 30 min. The resin is then washed twice with DMF, once with CH<sub>2</sub>Cl<sub>2</sub>, then again with DMF and finally Fmoc-deprotection by treatment twice with a 20% piperidine solution in DMF for 15 min.

Canonical Fmoc-amino acids were double-coupled for 30 min each with 4 eq. of the amino acid and 4 eq. of TBTU and DIPEA in each coupling. Non-canonical Fmoc-amino acids were also double coupled, but for 40 min and with 1.2 eq. of Fmoc-amino acid and 4 eq. of DIPEA and HBTU. N-terminal deprotection of the growing peptide chain Fmoc group was achieved by treatment twice with a 20% piperidine solution in DMF for 15 min. All couplings and N-terminal deprotections were monitored using the standard Kaiser test methods and HPLC-MS of test-cleavages.

The peptides were sidechain-deprotected and cleaved from the resin under acidic conditions for 2 h v/v [93:4:1:1:1] CF<sub>3</sub>COOH:H<sub>2</sub>O:phenol/triisopropylsilane/2,20-(ethylenedioxy)-diethanethiol]. The peptides were then precipitated in ice-cold Et<sub>2</sub>O, whereby the supernatant was then decanted, and the precipitate was dried under reduced pressure. Purification was achieved using reversed-phase HPLC on a 1260 Infinity system (Agilent Technologies) using a C<sub>18</sub> preparative column (21.2 x 250 mm, 10 µm; Agilent Technologies) with gradients from 95% acetonitrile, 5% water, 0.1% CF<sub>3</sub>COOH to 95% water, 5% acetonitrile, 0.1% CF<sub>3</sub>COOH.

The peptides were characterized by electrospray ionization (ESI) mass spectrometry in positive ion mode on an LTQ Orbitrap XL mass spectrometer. A Grace Grom-Sil-120-ODS-4-HE (length, 50 mm; ID, 2 mm, 3 mm) column was used with a linear gradient of 20–100% over 10 min at 0.3 mL/min. The solvent system used was A (0.1% formic acid in H<sub>2</sub>O) and B (0.1% formic acid in acetonitrile).

## 2. EXPERIMENTAL METHODS

**Sample preparation for CD spectroscopy.** For CD spectra, lyophilized TrpZip2 variants were dissolved in 20 mM phosphate buffer pH 2 to an optical density of  $\sim 0.8$  at 228 nm, as measured by conventional UV/VIS absorption spectroscopy. For CD spectra in presence of GdmCl, the buffer was supplemented with 8 M GdmCl.

**CD spectroscopy.** CD spectra of the TrpZip2 variants without and with 8 M GdmCl were recorded with a Jasco J720 spectrometer in thin-layer  $\text{CaF}_2$  cells with an optical path length of 5  $\mu\text{m}$ . The CD spectra were normalized to the UV/VIS absorption at 228 nm, which was recorded with a Hitachi U-2000 spectrophotometer in the same thin-layer cell.

**Sample preparation for laser measurements.** Lyophilized TrpZip2 variants were dissolved in 20 mM phosphate buffer pH 2 to a concentration of approximately 15 mg/ml. For measurements in presence of GdmCl the buffer was prepared with 8 M GdmCl. The peptide solution was centrifuged to get rid of any precipitant. Afterwards the sample was loaded into a custom-built mountable  $\text{CaF}_2$  cell with 100  $\mu\text{m}$  path length.

**Laser measurements.** A Ti:Sa regenerative amplifier system (Millennia, Tsunami, Empower, Spitfire) from Spectra Physics with 1 kHz repetition rate generating 800 nm pulses with 100 fs pulse duration and 3 mJ pulse energy was used to pump two home-built optical parametric amplifiers (OPAs). With one OPA we generated our mid-IR probe and reference pulses via difference frequency generation. Both pulses were guided through the sample, but hit the sample at spatially separated positions. Both pulses were dispersed on a spectrometer (Triax, Jobin Yvon) with a grating of 150 lines per millimeter and detected on a  $2 \times 32$  pixels nitrogen-cooled MCT detector (Infrared Associates). The detector signal was amplified and integrated with home-built electronics.

After a second OPA we generated our 613 nm pump pulse via second harmonic generation in a  $\beta$ -barium-borate (BBO) crystal. A mechanical chopper blocked every other pulse resulting in pump-on/pump-off difference spectra. The polarization angle between the pump and probe pulse was set to the magic angle with a half-wave plate and a polarizer to get rid of contributions from rotational diffusion. The pump and probe pulse diameters were 150  $\mu\text{m}$  and 65  $\mu\text{m}$  FWHM, respectively. The pump pulse energy was set to 8  $\mu\text{J}$ . The sample was loaded into a rotating and vertically moving cell with two  $\text{CaF}_2$  windows and a 100  $\mu\text{m}$  spacer in-between.

**Data analysis.** The TRIR data was analyzed with MatLab from MathWorks. The spectrum at -20 ps delay time was subtracted from every other time point of the TRIR spectrum as a background. In addition to that constant contribution, the azide signal is overlapping with a broad time dependent water signal caused by solvent heating. To subtract the water signal, we averaged the spectra after 54 ps delay time, where the azide signal has decayed, to a representative water spectrum. Note, that the signals at that late delay times is only due to solvent heating. This averaged water spectrum was fitted to the spectrum at every delay time by adjusting the amplitude and offset and then subtracted such that we are left with the azide signal. We calculated the total VET-induced azide absorption change by adding up the absolute absorption change at all pixels carrying the azide VET signal.

### 3. COMPUTATIONAL METHODS

**MD simulations.** Gulzar *et al.*<sup>1</sup> recently presented extensive non-equilibrium MD simulations of the energy flow in TrpZip2<sup>2</sup> (PDB entry 1LE1). All MD simulations were performed using GROMACS<sup>3</sup> package v2016.3, Amber99sb\*ILDN forcefield<sup>4-6</sup> and TIP3P water.<sup>7</sup> Following suitable equilibrium runs for each TrpZip2 variant considered at  $T_o = 300$  K (100 ns length each),  $N_{traj} = 5000$  statistically independent initial structures were stored for the subsequent non-equilibrium runs. To mimic the initial heating of azulene via electronic excitation and subsequent ultrafast ( $\sim 1$  ps) internal conversion<sup>8</sup>, the resulting vibrational excitation was approximated by an instantaneous temperature jump, where the excess energy  $k_B \Delta T$  is chosen to match the  $S_o \rightarrow S_1$  excitation energy of  $\sim 2$  eV, resulting in  $\Delta T \approx 600$  K. Following the heating of Azu to  $T_o + \Delta T$ , non-equilibrium MD simulations of 50 – 100 ps length were performed. It was found that  $NVT$  simulations (time step  $\delta t = 0.7$  fs) with only the solvent coupled to the thermostat (coupling constant  $\tau_T = 10$  ps) represents an efficient and accurate strategy.<sup>1</sup>

To monitor the flow of vibrational energy from the heater residue through the protein, we consider the time evolution of the kinetic energy of the  $i$ -th residue,  $E_i^{kin} = \sum_j E_{i,j}^{kin}(t)$ , where the sum runs over all atoms  $j$  of residue  $i$ . The time-dependent expectation value of the kinetic energy per degree of freedom,  $E_i(t)$ , is calculated via an ensemble average over  $N_{traj}$  non-equilibrium trajectories,

$$E_i(t) = \frac{1}{f_i N_{traj}} \sum_{n=1}^{N_{traj}} E_i^{kin}(n, t) - E_i^{eq}, \quad (1)$$

where  $f_i$  denotes the degrees of freedom of residue  $i$ . Since  $E_i^{eq} = k_B T/2$  is the equilibrium energy per degree of freedom,  $E_i(t)$  is expected to decay to zero at long times.

**Master equation model.** To describe the flow of vibrational energy in proteins, Buchenberg *et al.*<sup>9</sup> suggested a master equation

$$\frac{dE_j(t)}{dt} = \sum_i [k_{ij} E_i(t) - k_{ji} E_j(t)], \quad (2)$$

where  $E_i$  denotes the kinetic energy of residue  $i$  and  $k_{ij}$  represents the rate of energy transport from residue  $i$  to residue  $j$ . The model is valid in the case of diffusive energy transport,<sup>9</sup> which is typically found for solvated biomolecules.<sup>10</sup>

Due to the large number of transport rates ( $\sim N^2$  with  $N$  being the number of protein residues), a direct fit of the master equation to MD results is ill-defined and likely to yield non-physical results. On this account, Buchenberg *et al.*<sup>9</sup> derived scaling rules, which aim to describe energy transport rates in terms of a few parameters. In particular, by exploiting the equivalence of the master equation and a discrete diffusion equation, a scaling rule for the energy transport between two adjacent backbone residues  $i$  and  $j = i-1$  was derived,

$$k_{ij} = \frac{D_B}{\langle x_{ij}^2 \rangle} \sqrt{\frac{f_j}{f_i}}, \quad (3)$$

where  $D_B$  denotes the backbone diffusion coefficient and  $f_i$  denotes the degrees of freedom of residue  $i$ .  $\langle x_{ij}^2 \rangle$  represents the average square distance between every pair of atoms of residues  $i$  and  $j$  along covalent bonds, which reflects the average distance energy has to travel among every atom of both residues. The factor  $\sqrt{f_j/f_i}$  assures that the rates obey the detailed balance relation  $k_{ij} f_i = k_{ji} f_j$ . Employing distances commonly found for peptides and  $D_B = 1.1 \text{ nm}^2 \text{ps}^{-1}$ , typical transfer times between adjacent residues are  $1/k_{ij} = 0.5 - 1 \text{ ps}$ .<sup>11</sup>

Moreover, a scaling rule for the energy transport via polar contacts was derived,<sup>12</sup> using a multidimensional model that describes backbone transport and contact transport as diffusion processes in different directions using different energy diffusion constants. In direct analogy to scaling rule (3) for backbone transport, we then obtain for the contact transport rate

$$k_{ij}^c = \frac{D_C}{\langle q_{ij}^2 \rangle} \sqrt{\frac{f_j}{f_i}}, \quad (4)$$

where  $D_C$  denotes the contact diffusion constant and  $\langle q_{ij}^2 \rangle$  represents the mean square distance of the two contact atoms. Typical contact transfer times are  $0.6 - 30 \text{ ps}$ .<sup>12</sup> The contact, solvent and intra-residue rates used for all four variants of TrpZip2 in the classical model are summarized in Table I. Backbone transport was found to obey a diffusive scaling rule with a diffusion constant  $D_B = 1.1 \text{ nm}^2 \text{ps}^{-1}$ . All 1-12, 3-10 and 5-8 contacts are  $\beta$ -sheet-stabilizing hydrogen bonds, the remaining contacts being heater contacts (signaled by the index of the heater 'o').

In most cases, these heater contacts are of van der Waals/hydrophobic or stacking nature; however, the 0-12 heater contact in V<sub>3</sub> is a cation-aryl contact (the charged tip of Lys12 and the adjacent  $\epsilon$  group are attracted by the negatively charged ring center of Azu), and the 3-10 contact in V<sub>3</sub> is a dipole-dipole contact. Both heater contacts in V<sub>2</sub> are stacking contacts with Trp rings, while the remaining contacts in V<sub>1</sub> and V<sub>4</sub> are of van der Waals/hydrophobic nature in their dominant conformations. From the comparison of the hydrogen bond rates to several geometrical properties of these contacts, a scaling rule was found relating the inverse mean square distance to the rate value, with a diffusion constant  $D_C = 2.1 \cdot 10^{-3} \text{ nm}^2 \text{ ps}^{-1}$ . As discussed in detail by Valiño-Borau *et al.*,<sup>11</sup> the resulting master equation results for all four variants of TrpZip2 are in excellent agreement with the corresponding non-equilibrium MD simulations.

**Quantum corrections.** Based on a comparison of classical and quantum-mechanical perturbation theory, the validity of classical non-equilibrium molecular dynamics simulations to describe vibrational energy redistribution in biomolecules was studied in our previous work.<sup>12</sup> Adopting well-established models of vibrational relaxation, explicit expressions of quantum correction factors were derived, that are to be applied to the results of classical simulations in order to match the correct quantum results.

In this work, an empirical quantum correction was determined by fitting master equation results to experimental peak times. In this way we obtained a quantum correction factor of 3.1, which was applied to the master equation parameters  $D_b$  for backbone transport and  $D_C$  for contact transport, as well as the heating rate  $1/k_h$ . Details of the fitting procedure are described elsewhere. Since the water dissipation times  $1/k_{ps}$  of all systems were found to be quite similar in experiment ( $\sim 6 \text{ ps}$ ) and in MD ( $\sim 8 \text{ ps}$ ), we took the experimental values for the final model. The resulting parameters of the quantum-corrected master equation are comprised in Table I.

**Table S1.** List of systems, heater residues, and resulting parameters of the classical (left, red) and quantum-corrected (right, blue) master equation, including inverse heating rate  $1/k_h$ , solvent cooling time  $1/k_{ps}$ , solvent back-transfer time  $1/k_{sp}$ , and contact times  $\tau_{ij} = 1/k_{ij}$  (all in units of ps).

| Model         | classical           |                     |                     |                     | quantum corrected   |                     |                     |                     |
|---------------|---------------------|---------------------|---------------------|---------------------|---------------------|---------------------|---------------------|---------------------|
| System        | V1                  | V2                  | V3                  | V4                  | V1                  | V2                  | V3                  | V4                  |
| Heater        | Azu1                | Azu2                | Azu3                | Azu1                | Azu1                | Azu2                | Azu3                | Azu1                |
| $1/k_h$       | 5.9                 | 5.9                 | 5.9                 | 5.9                 | 2.0                 | 2.0                 | 2.0                 | 2.0                 |
| $1/k_{ps}$    | 7.5                 | 8.3                 | 8.3                 | 8.9                 | 6.3                 | 5.1                 | 5.4                 | 6.4                 |
| $1/k_{sp}$    | 120                 | 120                 | 120                 | 235                 | 120                 | 165                 | 120                 | 235                 |
| Contact times | $\tau_{1,12} = 9.1$ | $\tau_{1,12} = 110$ | $\tau_{1,12} = 7.7$ | $\tau_{1,12} = 11$  | $\tau_{1,12} = 3.0$ | $\tau_{1,12} = 37$  | $\tau_{1,12} = 2.6$ | $\tau_{1,12} = 3.7$ |
|               | $\tau_{3,10} = 8.3$ | $\tau_{3,10} = 9.2$ | $\tau_{3,10} = 5.9$ | $\tau_{3,10} = 10$  | $\tau_{3,10} = 2.8$ | $\tau_{3,10} = 3.1$ | $\tau_{3,10} = 2.0$ | $\tau_{3,10} = 3.3$ |
|               | $\tau_{5,8} = 9.1$  | $\tau_{5,8} = 9.1$  | $\tau_{5,8} = 9.1$  | $\tau_{5,8} = 9.1$  | $\tau_{5,8} = 3$    | $\tau_{5,8} = 3$    | $\tau_{5,8} = 3$    | $\tau_{5,8} = 3$    |
|               | $\tau_{0,11} = 300$ | $\tau_{0,9} = 59$   | $\tau_{0,5} = 71$   | $\tau_{0,12} = 300$ | $\tau_{0,11} = 100$ | $\tau_{0,9} = 20$   | $\tau_{0,5} = 24$   | $\tau_{0,12} = 100$ |
|               | $\tau_{0,12} = 300$ | $\tau_{0,11} = 77$  | $\tau_{0,10} = 125$ |                     | $\tau_{0,12} = 100$ | $\tau_{0,11} = 26$  | $\tau_{0,10} = 42$  |                     |
|               |                     |                     | $\tau_{0,12} = 43$  |                     |                     |                     | $\tau_{0,12} = 14$  |                     |

#### 4. PARTIAL UNFOLDING of TRPZIP

If VET in a  $\beta$ -hairpin would only occur via the backbone, unfolding should not affect the peak times of those TrpZip2 variants, where the VET donor-sensor pair are attached at opposing strands, *i.e.* V1-V3. To test this hypothesis, we performed VET measurements on V1-V3 in presence of 8 M GdmCl – a strongly denaturing condition for the majority of peptides and proteins. The hydrophobic interactions of opposing tryptophans, however, renders the hairpin fold of TrpZip2 highly stable against chemical denaturation. We managed to unfold V2 & V3 by only about 25% estimated from the exciton signal in the CD spectrum. Nevertheless, the peak times are significantly shifted by about 1 ps indicating that across-strand VET must have occurred to a significant extend via contacts which get disturbed when high molarity of GdmCl is added. V1 remains almost unaffected by GdmCl and accordingly, a shift of VET peak time is not observed.

The VET transient of the Azu-Aha dipeptide is unchanged when 8 M GdmCl is added. This confirms that the presence of GdmCl does not change the VET process, *e.g.* by changing energy transfer to the buffer.

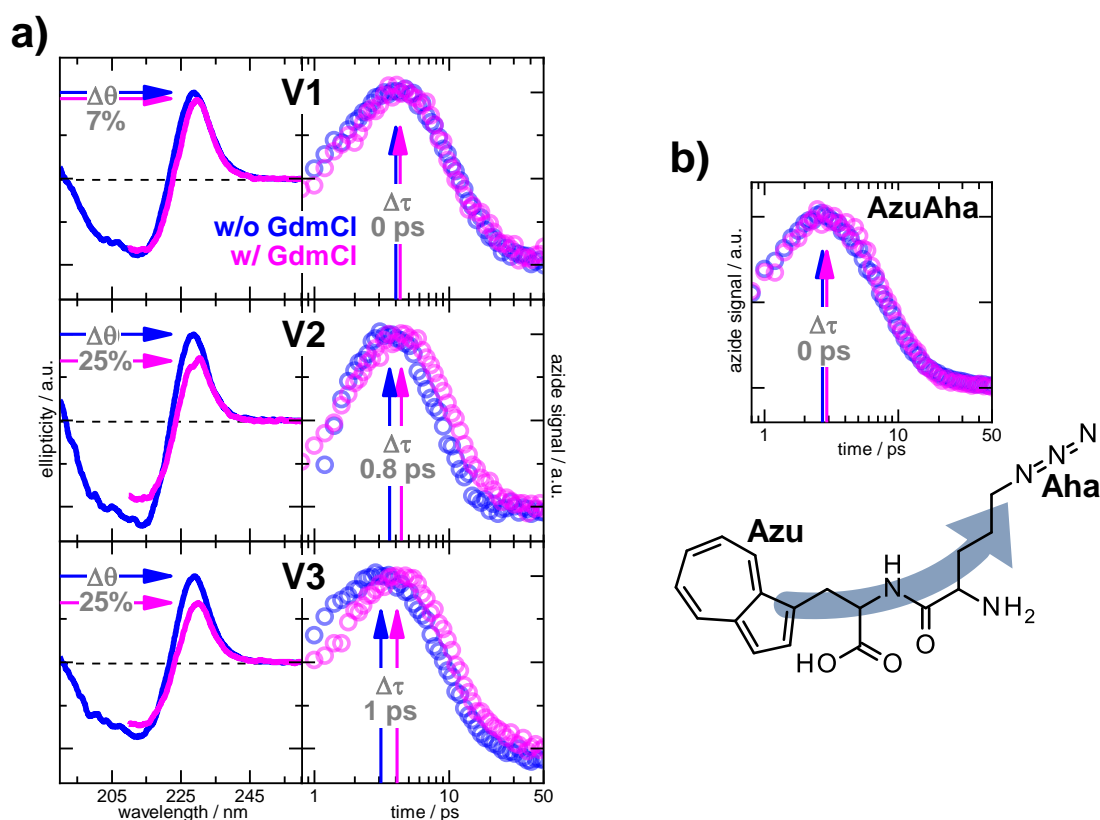

**Figure S1.** Comparison of VET in the presence and absence of unfolding agent. a) Collection of CD spectra (left) and VET traces (right) of all across-strand TrpZip2 variants V1-V3. Without GdmCl (blue) and with 8 M GdmCl (magenta). On the left panels colored arrows point to the peak at ~228 nm, as a measure for the hairpin fold. Decrease in exciton signal intensity is noted in grey. On the right panels colored arrows point to the VET peak time. Delay of VET is noted in grey. a) VET trace (top) of the Azu-Aha dipeptide. In the structure formula (bottom) the blue arrow indicates the mainly contributing path for efficient VET, which is along the backbone via covalent bonds.

## 5. SOLVENT DYNAMICS

In our VET measurements, the energy which is injected into the system via the attached azulene moiety will at some point dissipate into the solvent, either directly from the azulene to the solvent or from other parts of the system, where the vibrational energy has been transferred to. Just as the azide moiety, the heated water gives rise to VET signal occurring, however, on much longer timescales than the azide VET signal. This allows us to isolate the water contribution to determine its rise time  $\tau_{\text{water}}$  (on average  $\sim 6$ ps) as shown in Figure S2. These values are used for the rate model (see Section 3).

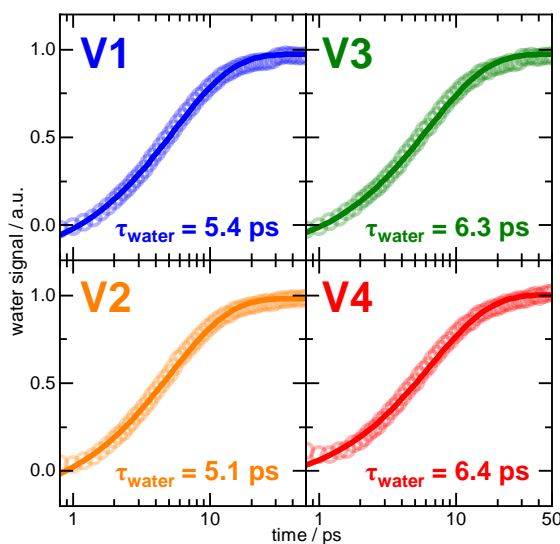

**Figure S2.** VET transients of the water heating for all four TrpZip2 variants. The transients (colored circles) are fitted with a monoexponential function (colored solid line) to give us the experimentally determined rise times  $\tau_{\text{water}}$ .

## 6. PATHWAYS

In the VET experiment we inject at time  $t = 0$  vibrational energy into a specific residue  $i$ , and probe at a delayed time  $t$  the energy content  $E_j(t)$  of some distant residue  $j$ . The energy flow from residue  $i$  to residue  $j$  may occur via several pathways, *e.g.* one pathway proceeding exclusively via the backbone and other pathways using a combination of backbone and contact transport. In practice, we are interested in the most efficient pathways that at a given time  $t$  have carried most of energy from  $i$  to  $j$ .

Since the rate matrix  $\{k_{ij}\}$  of master equation Eq. (2) completely accounts for the dynamics of the system, it also contains all information on energy transport pathways and their efficiency. Most straightforwardly, we obtain this information by running Markov chain Monte-Carlo simulations of the  $N$ -state (or  $N$ -residue) system. At each step, a random number is drawn which determines if the system remains in the current residue or changes to some other residue. In this way, we sample a stochastic trajectory in state space according to rate matrix  $\{k_{ij}\}$ . By counting how often the system has propagated from  $i$  to  $j$  along each possible pathway, the weights of these pathways are readily calculated. Figure S3 shows the resulting pathways obtained from a quantum-corrected master equation for all four variants of VET donor and sensor position.

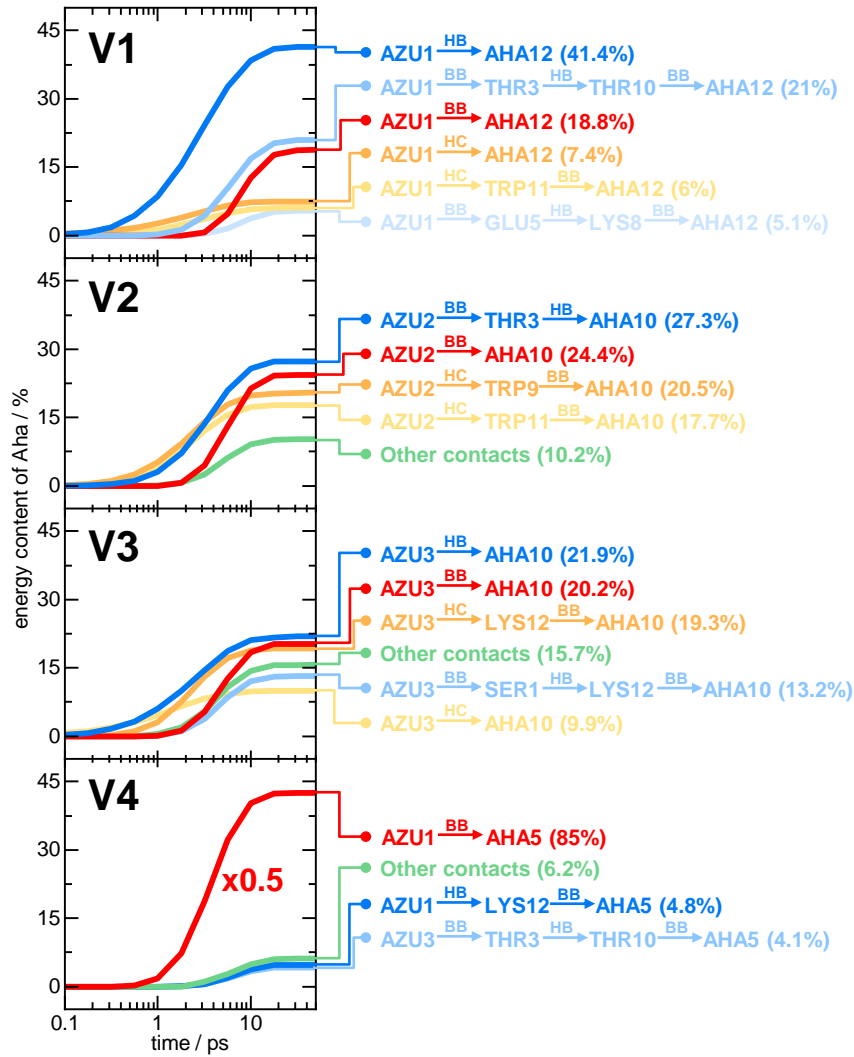

**Figure S3.** Contribution of various pathways to the energy transport from the Azu heater to the Aha probe, obtained for the four variants of TrpZip2. Pathways may include the backbone (BB), interstrand hydrogen bonds (HB), and heater contacts (HC).

## 7. REFERENCES

1. Gulzar, A., Valiño Borau, L., Buchenberg, S., Wolf, S. & Stock, G. Energy transport pathways in proteins: A nonequilibrium molecular dynamics simulation study. *J. Chem. Theory Comput.*, 5750–5757 (2019).
2. Cochran, A. G., Skelton, N. J. & Starovasnik, M. A. Tryptophan zippers: Stable, monomeric beta-hairpins. *Proc. Natl. Acad. Sci. U.S.A.* **98**, 5578–5583 (2001).
3. Abraham, M. J. *et al.* GROMACS: High performance molecular simulations through multi-level parallelism from laptops to supercomputers. *SoftwareX* **1**, 19–25 (2015).
4. Hornak, V. *et al.* Comparison of multiple Amber force fields and development of improved protein backbone parameters. *Proteins* **65**, 712–725 (2006).
5. Best, R. B. & Hummer, G. Optimized molecular dynamics force fields applied to the helix-coil transition of polypeptides. *J. Phys. Chem. B* **113**, 9004–9015 (2009).
6. Lindorff-Larsen, K. *et al.* Improved side-chain torsion potentials for the Amber ff99SB protein force field. *Proteins* **78**, 1950–1958 (2010).
7. Jorgensen, W. L., Chandrasekhar, J., Madura, J. D., Impey, R. W. & Klein, M. L. Comparison of simple potential functions for simulating liquid water. *J. Chem. Phys.* **79**, 926–935 (1983).
8. A. J. Wurzer, T. Wilhelm, J. Piel & E. Riedle. Comprehensive measurement of the S<sub>1</sub> azulene relaxation dynamics and observation of vibrational wavepacket motion. *Chem. Phys. Lett.* **299**, 296–302 (1999).
9. Buchenberg, S., Leitner, D. M. & Stock, G. Scaling Rules for Vibrational Energy Transport in Globular Proteins. *J. Phys. Chem. Lett.* **7**, 25–30 (2016).
10. Botan, V. *et al.* Energy transport in peptide helices. *Proc. Natl. Acad. Sci. U.S.A.* **104**, 12749–12754 (2007).
11. Valiño Borau, L., Gulzar, A. & Stock, G. Master equation model to predict energy transport pathways in proteins. *J. Chem. Phys.* **152**, 45103 (2020).
12. Stock, G. Classical simulation of quantum energy flow in biomolecules. *Phys. Rev. Lett.*, 118301 (2009).
